# Supplementary material for: Reverse Chemical Genetics: Comprehensive Fitness Profiling Reveals the Spectrum of Drug Target Interactions
Source: PubMed Central journal article supplement (PMC5010250; doi:10.1371/journal.pgen.1006275), 2016-09-02
Supplement: pgen.1006275.s007.pdf [file pgen.1006275.s007.pdf]

**S1 Table.** List of oligonucleotides used in this study.

| Primer | Sequence (5' to 3')                                      | Notes                                                                                                                                  |
|--------|----------------------------------------------------------|----------------------------------------------------------------------------------------------------------------------------------------|
| 1      | CCAGGCTTTACTTTATGCT                                      | Forward primer for plasmid-borne <i>dfr1</i> mutant amplification                                                                      |
| 2      | CTGTTGGGAAGGGCGATC                                       | Reverse primer for plasmid-borne <i>dfr1</i> mutant amplification                                                                      |
| 3      | ACATTATGCTTTGCATGATA                                     | Forward primer for <i>DFR1</i> gene fragment amplification; binds 55-nt upstream of <i>DFR1</i> ORF                                    |
| 4      | GTTCTATCACTATTTAACATATTAATAAT<br>ATACGGGCGGAGAGGTTTCATTT | Reverse primer with a 35-nt overhang sequence for <i>DFR1</i> gene fragment amplification; binds 14-nt downstream of <i>DFR1</i> ORF   |
| 5      | GTTCTATCACTATTTAACATATTAATAAT<br>ATACGGGCGGAGAGGTTATCGTT | Reverse primer with a 35-nt overhang sequence for <i>DHFR</i> gene fragment amplification; binds 14-nt downstream of <i>DFR1</i> ORF   |
| 6      | GTTCTATCACTATTTAACATATTAATAAT<br>ATAGTCGCCTTTTCACAACTT   | Reverse primer with a 35-nt overhang sequence for <i>DHFRL1</i> gene fragment amplification; binds 14-nt downstream of <i>DFR1</i> ORF |
| 7      | TCCTTACGTGCGTGAGAT                                       | Forward primer that binds ~100-nt upstream of the <i>DFR1</i> ORF; used for integration boundary validation                            |
| 8      | TGGATTCCCATGTCTTCCTT                                     | Reverse primer that binds within the <i>DFR1</i> ORF; used for integration boundary validation                                         |
| 9      | AGTATTTAGCGAGCAAGATC                                     | Forward primer that binds within the <i>DFR1</i> ORF; used for integration boundary validation                                         |
| 10     | AAATACTGCAGGTGAGGC                                       | Reverse primer that binds ~120-nt downstream of the <i>DFR1</i> ORF; used for integration boundary validation                          |
