# Supplementary material for: Reverse Chemical Genetics: Comprehensive Fitness Profiling Reveals the Spectrum of Drug Target Interactions
Source: PubMed Central journal article supplement (PMC5010250; doi:10.1371/journal.pgen.1006275), 2016-09-02
Supplement: pgen.1006275.s008.pdf [file pgen.1006275.s008.pdf]

**S2 Table.** Variant calls in the diploid *DFR1/dfr1Δ* pool.

| Position | Region     | T1      | T2      | T3      | Residue                   |
|----------|------------|---------|---------|---------|---------------------------|
| 780403   | promoter   | -503C>T | -503C>A | -503C>A |                           |
| 780414   | promoter   | -492A>T | -       | -       |                           |
| 780415   | promoter   | -       | -491T>G | -       |                           |
| 780431   | promoter   | -475C>T | -475C>T | -       |                           |
| 780458   | promoter   | -448C>A | -448C>A | -448C>A |                           |
| 780467   | promoter   | -       | -439T>C | -       |                           |
| 780531   | promoter   | -       | -375T>G | -       |                           |
| 780618   | promoter   | -288A>T | -       | -       |                           |
| 780619   | promoter   | -287A>T | -       | -287A>T |                           |
| 780640   | promoter   | -266T>C | -       | -       |                           |
| 780714   | promoter   | -       | -       | -192A>G |                           |
| 780748   | promoter   | -       | -158T>C | -       |                           |
| 780789   | promoter   | -117C>A | -       | -       |                           |
| 780811   | promoter   | -       | -95C>A  | -       |                           |
| 780814   | promoter   | -       | -92T>C  | -       |                           |
| 780936   | cds        | 31A>G   | 31A>G   | -       | I11V <sup>+</sup>         |
| 780937   | cds        | 32T>C   | -       | 32T>C   | I11T <sup>+</sup>         |
| 780950   | cds        | -       | 45A>G   | -       | L15L <sup>+</sup>         |
| 780980   | cds        | -       | 75A>G   | -       | G25G <sup>+</sup>         |
| 780985   | cds        | -       | 80T>A   | -       | L27Q <sup>+</sup>         |
| 780986   | cds        | 81A>G   | -       | -       | L27L <sup>+</sup>         |
| 780990   | cds        | -       | 85T>C   | -       | W29R <sup>+</sup>         |
| 781008   | cds        | 103A>G  | 103A>G  | 103A>G  | M35V <sup>+</sup>         |
| 781009   | cds        | 104T>C  | 104T>C  | 104T>C  | M35T <sup>+</sup>         |
| 781011   | cds        | -       | 106A>G  | -       | K36E <sup>+</sup>         |
| 781017   | cds        | -       | 112T>A  | -       | F38I <sup>+</sup>         |
| 781018   | cds        | 113T>A  | 113T>A  | -       | F38Y <sup>+</sup>         |
| 781020   | cds        | -       | -       | 115A>G  | R39G <sup>+</sup>         |
| 781024   | cds        | -       | 119A>C  | -       | Q40P <sup>+</sup>         |
| 781070   | cds        | 165A>G  | -       | -       | I55M <sup>+</sup>         |
| 781092   | cds        | 187T>G  | 187T>A  | -       | S63A <sup>+</sup> /S63T   |
| 781096   | cds        | -       | 191T>C  | -       | I64T <sup>+</sup>         |
| 781097   | cds        | 192A>G  | 192A>G  | 192A>G  | I64M <sup>+</sup>         |
| 781100   | cds        | 195G>A  | 195G>A  | -       | P65P <sup>+</sup>         |
| 781107   | cds        | -       | 212T>C  | -       | F68L <sup>+</sup>         |
| 781230   | cds        | -       | 325G>A  | -       | E109K <sup>+</sup>        |
| 781257   | cds        | -       | 352A>G  | -       | R118G <sup>+</sup>        |
| 781326   | cds        | -       | 421A>G  | -       | T141A <sup>+</sup>        |
| 781368   | cds        | -       | 463G>C  | -       | D155H <sup>+</sup>        |
| 781371   | cds        | -       | 466A>G  | -       | T156A <sup>+</sup>        |
| 781406   | cds        | -       | 501T>G  | 501T>C  | F167L <sup>+</sup> /F167F |
| 781432   | cds        | 527A>C  | 527A>C  | -       | K176T <sup>+</sup>        |
| 781439   | cds        | 534T>C  | -       | 534T>C  | F178F <sup>+</sup>        |
| 781464   | cds        | -       | 559G>A  | 559G>A  | E187K <sup>+</sup>        |
| 781500   | cds        | 595A>G  | -       | 595A>G  | K199E <sup>+</sup>        |
| 781510   | cds        | 605G>T  | -       | -       | C202F <sup>+</sup>        |
| 781530   | cds        | 625A>C  | 625A>C  | 625A>C  | N209H <sup>+</sup>        |
| 781532   | cds        | 627T>C  | -       | 627T>C  | N209N <sup>+</sup>        |
| 781588   | terminator | -       | *47A>G  | -       |                           |
| 781597   | terminator | *56G>T  | -       | -       |                           |
| 781616   | terminator | -       | -       | *75G>T  |                           |
| 781683   | terminator | -       | -       | *142C>A |                           |
| 781697   | terminator | *156C>T | -       | -       |                           |
| 781706   | terminator | -       | *165T>C | -       |                           |
| 781720   | terminator | -       | *179A>C | *179A>C |                           |
| 781723   | terminator | -       | *182A>G | -       |                           |
| 781776   | terminator | *185T>C | -       | -       |                           |
| 781782   | terminator | *241T>G | -       | -       |                           |
| 781801   | terminator | *260C>A | *260C>A | -       |                           |
| 781883   | terminator | *342G>A | -       | -       |                           |
| 781940   | terminator | *399G>T | -       | -       |                           |
| 782001   | terminator | -       | *460A>G | *460A>C |                           |
| 782009   | terminator | -       | *468A>C | -       |                           |
| 782015   | terminator | *474T>A | -       | -       |                           |
| 782018   | terminator | -       | *477T>G | -       |                           |
| 782061   | terminator | *520A>T | *520A>T | -       |                           |

Note: Positions with more than one variant change are shown in red. Previously known residues to modulate antifolate resistance are highlighted in blue.

\*Variants selected for validation
