# Supplementary material for: Reverse Chemical Genetics: Comprehensive Fitness Profiling Reveals the Spectrum of Drug Target Interactions
Source: PubMed Central journal article supplement (PMC5010250; doi:10.1371/journal.pgen.1006275), 2016-09-02
Supplement: pgen.1006275.s009.pdf [file pgen.1006275.s009.pdf]

**S3 Table.** Variant calls in the haploid *df<sub>r</sub>1Δ* pool.

| Position | Region     | T1      | T2      | T3      | Residue            |
|----------|------------|---------|---------|---------|--------------------|
| 780475   | promoter   | -431T>C | -431T>C | -431T>C |                    |
| 780516   | promoter   | -       | -       | -390G>A |                    |
| 780585   | promoter   | -321A>G | -321A>G | -321A>G |                    |
| 780612   | promoter   | -294T>A | -294T>A | -294T>A |                    |
| 780619   | promoter   | -287A>T | -287A>T | -287A>T |                    |
| 780657   | promoter   | -       | -       | -249A>T |                    |
| 780666   | promoter   | -       | -       | -240G>A |                    |
| 780756   | promoter   | -       | -150G>A | -150G>A |                    |
| 780803   | promoter   | -       | -       | -103G>A |                    |
| 780819   | promoter   | -       | -       | -87A>G  |                    |
| 780833   | promoter   | -73C>T  | -       | -       |                    |
| 780852   | promoter   | -       | -       | -54C>T  |                    |
| 780903   | promoter   | -       | -       | -3A>T   |                    |
| 780953   | cds        | -       | -       | 48G>A   | Q16Q <sup>+</sup>  |
| 781122   | cds        | 217A>T  | -       | -       | N73Y <sup>+</sup>  |
| 781123   | cds        | 218A>T  | 218A>T  | 218A>T  | N73F               |
| 781155   | cds        | 250A>G  | 250A>G  | -       | K84E <sup>+</sup>  |
| 781211   | cds        | 306A>T  | 306A>T  | 306A>T  | A102A              |
| 781217   | cds        | 312A>G  | 312A>G  | -       | A104A <sup>+</sup> |
| 781229   | cds        | 324A>G  | 324A>G  | 324A>G  | L108L              |
| 781253   | cds        | -       | -       | 348G>A  | L116L <sup>+</sup> |
| 781284   | cds        | 379G>A  | -       | -       | V127I <sup>+</sup> |
| 781328   | cds        | -       | -       | 423G>A  | T141T <sup>+</sup> |
| 781331   | cds        | 426A>G  | 426A>G  | 426A>G  | K142K <sup>+</sup> |
| 781358   | cds        | 453T>A  | 453T>A  | 453T>A  | T151T              |
| 781374   | cds        | -       | -       | 469T>C  | F157L <sup>+</sup> |
| 781450   | cds        | -       | -       | 545A>T  | K182I              |
| 781481   | cds        | -       | 576A>T  | 576A>T  | Q192H              |
| 781502   | cds        | -       | -       | 597A>T  | K199N              |
| 781532   | cds        | -       | 627T>C  | -       | N209N <sup>+</sup> |
| 781547   | terminator | *6C>T   | -       | -       |                    |
| 781572   | terminator | *31T>G  | *31T>G  | -       |                    |
| 781620   | terminator | -       | -       | *79C>T  |                    |
| 781622   | terminator | *81A>G  | -       | -       |                    |
| 781633   | terminator | *92T>A  | -       | -       |                    |
| 781673   | terminator | *132G>A | *132G>A | *132G>A |                    |
| 781728   | terminator | *187T>A | *187T>A | *187T>A |                    |
| 781749   | terminator | -       | -       | *208G>A |                    |
| 781774   | terminator | -       | *233C>T | -       |                    |
| 781819   | terminator | -       | *278T>A | -       |                    |
| 781825   | terminator | -       | -       | *284C>T |                    |
| 781910   | terminator | *369T>A | -       | -       |                    |
| 781955   | terminator | *414T>A | *414T>A | -       |                    |
| 781974   | terminator | -       | -       | *433C>T |                    |
| 781996   | terminator | *455G>T | *455G>T | -       |                    |
| 782028   | terminator | -       | -       | *487C>T |                    |
| 782049   | terminator | *508C>A | -       | -       |                    |
| 782060   | terminator | *519G>A | *519G>A | *519G>A |                    |
| 782068   | terminator | *527G>A | *527G>A | *527G>A |                    |

Note: Previously known residues to modulate antifolate resistance are highlighted in blue.

<sup>+</sup>Variants selected for validation
