# Supplementary material for: Reverse Chemical Genetics: Comprehensive Fitness Profiling Reveals the Spectrum of Drug Target Interactions
Source: PubMed Central journal article supplement (PMC5010250; doi:10.1371/journal.pgen.1006275), 2016-09-02
Supplement: pgen.1006275.s010.pdf [file pgen.1006275.s010.pdf]

**S4 Table.** The fitness profiles of *dfr1*, hDHFR and hDHFR1 alleles in the diploid *DFR1/dfr1Δ* background.

| Allele                    | Viability | Growth rate (hr) | Relative growth in MTX |
|---------------------------|-----------|------------------|------------------------|
| <i>DFR1/dfr1Δ</i>         | yes       | 6.6+/-0.0        | 62.1%+/-1.8%           |
| <i>DFR1/dfr1</i> (I11V)   | yes (p)   | 8.7+/-0.5        | 63.02%+/-4.5%          |
| <i>DFR1/dfr1</i> (I11T)   | yes       | 6.2+/-0.1        | 67.5%+/-2.9%           |
| <i>DFR1/dfr1</i> (L15L)   | yes       | 5.9+/-0.3        | 47.1%+/-1.6%           |
| <i>DFR1/dfr1</i> (G25G)   | yes       | 5.9+/-0.1        | 68.7%+/-1.6%           |
| <i>DFR1/dfr1</i> (L27Q)   | yes (p)   | 7.1+/-0.0        | 92.8%+/-5.6%           |
| <i>DFR1/dfr1</i> (L27L)   | yes       | 4.7+/-0.4        | 59.3%+/-3.9%           |
| <i>DFR1/dfr1</i> (W29R)   | yes (p)   | 5.4+/-0.2        | 60.1%+/-5.7%           |
| <i>DFR1/dfr1</i> (M35V)   | yes       | 6.4+/-0.1        | 105.3%+/-3.2%          |
| <i>DFR1/dfr1</i> (M35T)   | yes       | 5.3+/-0.3        | 107.6%+/-4.9%          |
| <i>DFR1/dfr1</i> (K36E)   | yes (p)   | 6.1+/-0.1        | 52.8%+/-2.0%           |
| <i>DFR1/dfr1</i> (F38I)   | yes (p)   | 4.8+/-0.2        | 54.4%+/-2.6%           |
| <i>DFR1/dfr1</i> (F38Y)   | yes       | 3.6+/-0.0        | 97.8%+/-0.8%           |
| <i>DFR1/dfr1</i> (R39G)   | yes       | 9.8+/-0.2        | 63.1%+/-6.1%           |
| <i>DFR1/dfr1</i> (Q40P)   | yes (p)   | 9.9+/-0.2        | 80.9%+/-4.1%           |
| <i>DFR1/dfr1</i> (I55M)   | yes (p)   | 5.1+/-0.2        | 71.3%+/-6.9%           |
| <i>DFR1/dfr1</i> (S63A)   | yes (p)   | 12.1+/-0.4       | 64.2%+/-0.1%           |
| <i>DFR1/dfr1</i> (I64T)   | yes (p)   | 5.2+/-0.0        | 66.8%+/-0.6%           |
| <i>DFR1/dfr1</i> (I64M)   | yes (p)   | 10.6+/-0.0       | 69.6%+/-0.6%           |
| <i>DFR1/dfr1</i> (P65P)   | yes       | 5.1+/-0.2        | 66.9%+/-7.0%           |
| <i>DFR1/dfr1</i> (F68L)   | yes       | 4.7+/-0.1        | 74.9%+/-2.3%           |
| <i>DFR1/dfr1</i> (E109K)  | yes       | 8.5+/-0.1        | 92.5%+/-2.5%           |
| <i>DFR1/dfr1</i> (R118G)  | yes       | 6.1+/-0.0        | 106.4%+/-2.8%          |
| <i>DFR1/dfr1</i> (T141A)  | yes (p)   | 6.1+/-0.2        | 89.4%+/-1.7%           |
| <i>DFR1/dfr1</i> (D155H)  | yes (p)   | 12.1+/-0.1       | 60.9%+/-3.4%           |
| <i>DFR1/dfr1</i> (T156A)  | yes (p)   | 3.9+/-0.5        | 75.7%+/-4.9%           |
| <i>DFR1/dfr1</i> (F167L)  | yes       | 9.0+/-0.4        | 65.1%+/-2.9%           |
| <i>DFR1/dfr1</i> (K176T)  | yes       | 5.9+/-0.1        | 113.8%+/-6.9%          |
| <i>DFR1/dfr1</i> (F178F)  | yes       | 5.9+/-0.3        | 70.2%+/-3.1%           |
| <i>DFR1/dfr1</i> (E187K)  | yes (p)   | 5.9+/-0.1        | 72.9%+/-2.1%           |
| <i>DFR1/dfr1</i> (K199E)  | yes       | 6.0+/-0.6        | 86.6%+/-7.9%           |
| <i>DFR1/dfr1</i> (C202F)  | yes (p)   | 5.1+/-0.0        | 73.6%+/-4.6%           |
| <i>DFR1/dfr1</i> (N209H)  | yes (p)   | 15.7+/-3.0       | 68.6+/-13.6%           |
| <i>DFR1/dfr1</i> (N209N)  | yes       | 11.4+/-0.6       | 49.3%+/-2.4%           |
| <i>DFR1/DHFR</i> (W25R)   | yes       | 5.1+/-0.8        | 99.3%+/-8.2%           |
| <i>DFR1/DHFRL1</i> (R25W) | yes       | 5.1+/-0.3        | 80.2%+/-5.4%           |
| <i>DFR1/DHFRL1</i>        | yes       | 6.3+/-0.1        | 104.1%+/-1.5%          |

Note: The average growth in the presence of MTX (1 mM) was measured relative to DMSO treatment (see Methods for details). Control strains: wild-type homozygous diploid BY4743 and heterozygote *DFR1/dfr1Δ* were included. All growth assays were repeated in 3 independent experiments and standard error was calculated for each mutant. Mutant alleles that exhibited a “petite” phenotype due to growth defects in obligate respiratory conditions, are annotated with (p).
