# Supplementary material for: Reverse Chemical Genetics: Comprehensive Fitness Profiling Reveals the Spectrum of Drug Target Interactions
Source: PubMed Central journal article supplement (PMC5010250; doi:10.1371/journal.pgen.1006275), 2016-09-02
Supplement: pgen.1006275.s011.pdf [file pgen.1006275.s011.pdf]

**S5 Table.** The fitness profiles of *dfr1* alleles identified in the haploid *dfr1*Δ background.

| Allele              | Viability | Growth rate (hr) in the: |              | Relative growth in MTX in the: |               |
|---------------------|-----------|--------------------------|--------------|--------------------------------|---------------|
|                     |           | Haploid                  | Heterozygote | Haploid                        | Heterozygote  |
| BY4741              | yes       | 5.1+/-0.0                | 5.7+/-0.0*   | 57.6%+/-0.5%                   | 35.1%+/-2.0%* |
| BY4742              | yes       | 5.3+/-0.0                | -            | 53.7%+/-1.6%                   | -             |
| <i>dfr1</i> (Q16Q)  | yes       | 4.8+/-0.0                | 12.5+/-0.0   | 55.7%+/-0.9%                   | 46.5%+/-0.9%  |
| <i>dfr1</i> (N73Y)  | yes       | 13.6+/-2.1 (p)           | 6.1+/-0.1    | 99.1%+/-3.9%                   | 44.8%+/-3.0%  |
| <i>dfr1</i> (K84E)  | yes       | 9.2+/-0.1                | 5.9+/-0.1    | 96.7%+/-2.6%                   | 72.3%+/-5.9%  |
| <i>dfr1</i> (A104A) | yes       | 6.0+/-0.0                | 9.3+/-0.2    | 92.9%+/-0.6%                   | 81.0%+/-1.0%  |
| <i>dfr1</i> (L116L) | yes       | 6.4+/-0.0                | 8.5+/-0.2    | 77.9%+/-0.2%                   | 58.9%+/-1.5%  |
| <i>dfr1</i> (V127I) | yes       | 8.6+/-0.3                | 4.1+/-0.0    | 78.7%+/-1.1%                   | 60.9%+/-2.0%  |
| <i>dfr1</i> (T141T) | yes       | 12.5+/-2.5               | 6.3+/-0.0    | 94.0%+/-4.0%                   | 56.7%+/-1.1%  |
| <i>dfr1</i> (K142K) | yes       | 6.8+/-0.1                | 10.0+/-0.1   | 88.6%+/-3.3%                   | 57.5%+/-1.4%  |
| <i>dfr1</i> (F157L) | yes       | 6.7+/-0.1 (p)            | 9.3+/-0.3    | 82.7%+/-0.7%                   | 54.5%+/-2.3%  |
| <i>dfr1</i> (N209N) | yes       | 5.0+/-0.0                | 11.4+/-0.6   | 79.3%+/-0.6%                   | 49.3%+/-2.4%  |

\*wild-type (BY4743)

Note: The average growth in the presence of MTX (1 mM) was measured relative to DMSO treatment (see Methods for details). Control strains: wild-type homozygous diploid BY4743, haploid BY4741 and BY4742 were included. All growth assays were repeated in 3 independent experiments and standard error was calculated for each mutant. Mutant alleles that exhibited a “petite” phenotype due to growth defects in obligate respiratory conditions, are annotated with (p).
