# Supplementary material for: Reverse Chemical Genetics: Comprehensive Fitness Profiling Reveals the Spectrum of Drug Target Interactions
Source: PLoS Genet. 2016 Sep 2;12(9):e1006275. doi: 10.1371/journal.pgen.1006275 (PMC5010250; doi:10.1371/journal.pgen.1006275)
Supplement: S6 Table — (PDF) [file pgen.1006275.s012.pdf]

**S6 Table. Synthetic gene fragments used to reconstruct *dfr1* mutants.**

> Human DHFR(WT)  
ACATTATTTCTTGGCATGATAAAGAGAAATTAAGAGCGCAACGAACACGAGCATGTTGGTCTTGAACGTATCGTCGTCTCTCAAAACATGGGTATTGGTAAGAACGGTGACTGCCATGGCCACATTGAGAAACGAATTTCAGAT  
ATTTCACAAAGATGACCTACCACTTCTCTGTGGAAGTAAAGCAAACTTAGTATTATGGGTAAAGAAGACCTGTTCTTATTCCAGAGAAAAACAGACCATTGAAGGGTAGAATCAACTTGGCTTGTGTAGAGAGTTAAAGGAACACCTCAA  
GGTGCCCAATTCTGTGCAGATCCTGGATGATGCTTTGAAGTTGACTGAACAACCAAGAAATGGCTAACAAAGGTTGACATGGTTGGATGTTGGTGTTCTCCGTTTACAAAGGAAGCCATGAACATCCAGGTCAATTGAAAGTGGTGTGCAC  
TAGAATCATCGCAAGACTTCGAATCTGATCACTTTTTCCCTGAAATCGATTAGAAAAATACAAATGTTTACCAAGAATACCCAGGTGTTTATCTGATGTCACAAAGAAAAAGGATCAAGTACAAATTCGAGGTTTATGAAAGAACGATAACC  
TCTCCGCCCG

ACATTATG DHFR (W25R)  
 CAGCTTCGTCCTGATGATAAAGAGAAATTAAGAGCGCAACGAACACAGAGATGGTTGGTCTTCACTGGCTATCTGCTGCTCTCAAAACATGGGTATTGGTAAGAACGCTGACTTCCACGGCCACCATTTGAGAAACGAATTTCAGAT  
 ATTTCCAAAGAATGACAGCACTACCTTCCTGTCGAGGTAAGCAACGATGATTATTAAGGTGAAGAACAGCTGTGTTCTATTCCAGAGAAAAACAGACCATTAAGGAGTGAAGAACCAACTTGGTCTGTGTACAGAGGTAAAGAGCAACCTCAAG  
 GTGCCCACTTCTCTTCGACAGTCCTGGATGATCTTGAAGTTGACGAACCAAGAAATGGGCTAACCAAGGTTGATGCTGGTGGTCTTCGGTTATCCAGATCAACCAATCAAGCACTGAGGTCATTGGAAGTTGGTTCGAC  
 TAGAATCACTCAAGACCTTCCAATCTGATACCTTTTTCCCTGAAATCGATTAGAAAAATACAAATGTTTACAGAAATACCCAGGTGTTTATCTGATGTTCAAGAGAAAAGGGGTATCAAGTACAAATTCAGGTTTATGAAAAGAACGATAACTC  
 TCTCCGCCCG

> Human DHFR1L (WT)  
ACATTATGCTTTCGATGATAAAGAGAGAAATTAAGAGCGCAACGAACACGAGCATGTTCTTGTTATTGAACGTATCGTTGCTGTCTCCAAAACATGGGTATTGGTAAGAAATGGTGATTTCGCACTGCCACATTGAGAAATGAATTGCAGATATTTCACCAAGTACGACCAACCTCTTCTGTTGAGGGAAGAAAACCAATCATTTAGGCTGGAAGAAAGACCTGGTCTCTTCTTGCAAAAAGACCTCCATTAAGGAATGAATCAATCTGGTCTGTGTAGGAGAATGAAGAAAGCACTTCATGGTCTCACTCTTCGGTGGCTCTTATGCTTATGGACGCTTAAAGTTAACTGAAAGACAGAATGGCTAATAAGGTTGCATGATCTGGATTGTGGTGTTCTTCTGTCTATGAAGAACTGAACCACTTGTGGCTCACTGAGTAATGTTCTGTTCATAGAATCAACAAGCTTTGAAATCTGTACATCTTCTTTTCTGAAATCGACTTGGAAAAGTACAAGTTGTGTCAGAGATACCTGGTGTGTTGTTGTCGATCTCAAGAAGGTGAAGCACATCAAGTACAAATTCGAAGTTGTGTAAGAAAGGACGACAACTCTCCGCGCCG

> Human DHFR1L1 (R25W)  
 ACATTATGCTTTCGATGATAAAGAGAAATTAAGAGCGCAACGAACACGAGCATGTTCTTGTTATTGAACGTATCGTTGCTGTCTCCAAAACATGGGTATTGGTAAGATGTTGATTTCGCATGGCCACCATTGAGAAATGAATTTCAGAT  
 ATTTCGTAACCAAGTACGACCAACCATCTCTGTTGGAGGTAAGAAAACCAATCATTTAGTGAGGACAGCATGTTGTTCTTCTTCAAGAAAGACCTCCATTAAGGATGAATCAATCTGTGTCCTGTAGGAAATGAAGAGCACCCTCA  
 GGCTGCATCTCTTCGGTCTGCTTTTGGACAGCTCTAAAGTTAACTGAAGACAGAAATGGGTAAGGTAAGGTCATCATGATCGATTGGATTGGTTGGTCTTCTGCTCATAGAAGGATGATGAACCATCTGGCTGCTGAGTGAATTTCTTAC  
 TAGAATCATCAAGACGCTTGAATCTGTATCTTTCTTCTGAAATCGACCTGGAAAAGTACAAGTTGTGTCAGAGTACCCCTGGTGTGTTGTCTGACGTTTCAAGAAGGTAAAGCACATCAAGTACAATTCGAAAGTTTGTGAAAGGACGACAACTC  
 TGTCCGCCCG

> DFR1 (V1271)  
 ACATATTCCTTGTCATGATAAAGAGAAATGAAGAGCGCAACGAACACGAGCATGCGTGGAGGAAGAATCTCTATTGTAGGAATTGTGCGATGTTACAGCGGGAGATGGGATAGGATTCTGTTGAGGTTACCACTGGAGGTTGCCCGAGTGA  
 AATAAGTAATGATTCCAGACGAAGCATCTTCATTGACGAAGATGCAACAAACCAAGAGCTGTTGATATGGGAGGAAGCATAGGAAGTCATACCGCCGCAAGTTGGCTGCCACCTCAATGAAATAGAGTGACATTCATTAACGAAAGATCTCAAGGAC  
 TTTGCTTCCGACGATAAAGAGAGATCAATAGTCCCAAGTAATCTATGGCAACCAAGTAATGAACCTAGAAAGCAATTTTAAAGGACATCTGGAAAGAACTACGATGTTGGGGTGGGGGAAATTTATGTCGCAAACTCTCTCTCAATCAGCATCT  
 TTGGCTCATCGCAAAAATAAATCTCATTAGATAAAATCGCACTCTCGCAATGGACACTCTCTGTGATCGGAAGAATTTGGAAGAAGATTATAGCAGACCAAGATCGGGCCGAGCTGAAAGAAATTTCTTCCCTTAAAGTAGATGTTGCCCGAAACAG  
 CATTGATTCACGCTCATCTGCGTGGAAAGAAAGGTTATGCTTCAATCTACTTACATACTGTAATGAACCTCTCGCCGCG

> DFR1(F157L)  
 AAGTTCCTTTCGATGATAAATAGAGAAATTAAGAGCGCAACGAACACGAGCATGGCTGGAGGAAGAATCTTATTGTAGGAATTGTGGCATGTTACACGCGGAGATGGGATAGGATTTCGTGGAGGTCACCATGGAGGTGCGCCAGTGA  
 AATAAGAGATCTTCAGACAGGCTCACTTCATGCGAAGAATGCAAAACAAAGAGAGCTGTTGATATGGGAGGAAGCATAGGAAGCATACACCGCCCAAGTTTGGCCACCTGCAATAGAAATGAATGCTATTATCAGCAAGAGCTTCGAAGGAC  
 TATTGTTCGACATAAAGAGAGATCAATTCGTCAGGAATTAATCTGGCAAGCAACGAATGAATGAACCTAGAAAGCAATTTTAAAGGACATCTGGAAAGAACTACGTGATCTGGGGTGGGGGAAGTTTTCGATCAAACTTCCTTCATACGATCAT  
 TTGGCTCATCGCAAAATTAAGCTCATTAGATAAAAAAGCGCAACTCTGCAATGGACACTCTTGATGCGAAGAATTTGGAAGAGATGTTTGAACGAGCAAGATCGGGCCGAGCTGAAAGAAATTTCTCCCTTAAAGTAGATGTGCCCGAAACAG  
 CACTGTGATCAACGCTACTCGCTGGAGCAAAAAGGTTTGTCTGCAATCTCTATACACTCTGTAATGAACCTCTCGCCGCG

> DFR1 (K84E)  
ACATTGCTTTCGTCGATAATAAGAGAAATTAAGAGCGCAACGAACACGAGCATGGCTGGAGAAAGATTCCTATTGTAGGAATTGTGGCATGTTACACGCGGAGATGGGATAGGATTCTCGTGAGGTTACCACTGGAGGTGTCGCAGTGA  
AAATGAAAGATTTTCAGACAGAGGCTCACTTCGACGAAGATGCAAAACAAAGAGAGCTGTTGATATGGGAGGAAGCATATGGGAATCATACCGCCGCAAGTTTGCCTCCAGCAATGAAGATGCGATTCATTATACGAAAGAGCTTCGGAGGAC  
CATTTGTTCGCACATAAGAGAGATCAATTCGTCGCAAGTAATTCATGGCAACCAAGTAATGAACCTAGAAAGCAATTTTAAAGGACATCTGGAAAGGATCATCGTGTCTGGGGTGGGGGAAGTTTATGTCGCAAACTTCTCTCAATACGATCAT  
TTGGCTCATCGCAAAATAAATCTCATTAAGATAAAACGCAACTCTGCAATGGACACTTCTCTGTGCGAAGAATTTTGGAAAGGATTTTGAACGAGCAAGATCGGGCCGAGCTGAAAGAAATTTCTCCCTCCATAAGATAGATGTGCCGGAACAG  
CTCTGATCAACGCTACTCGCTGGAGCAAAAAGGTTTGTCTGCAATTCACTCTATACAATCGAATGAACCTCTCCGCCGC

> DFR1(N73Y)  
 ACATTCATTGCTTCGATGATAATAAGAGAAATTAAGAGCGCAACGAACACGAGCATGCGTGGAAGAAAGATTCCTATTGTAGGAATTGTGGCATGTTACACGCGGAGATGGGAGTAGGATTCTCGTGAGGCTACCACTGGAGGTGTCGCCAGTG  
 AATAAGTAAGTATTTCAGACAGAGACATCTTCATTGCAAGTAATCAACAAACAAAGAGCTGTTGATATGGGAGGAAGCATATGGGAATCATACACCGCCCAAGTTTGGCCGCACTGCTTATAGAAATGATGCTCATTAATCAGGAAGCTCTCAAGGAC  
 TTTGCTTCCGACGATGAAGAGCATCAATGATCGCAAGTAATTCATGTGCCAAACGCAATTAAGAATCACTAGAAGAACTATTGAAGGATTCATGGAAAGACTACGTGATTGGGGTGGGGGAAGTTTATGCTCAAAATCTTCTCATTACGACATG  
 CTGGCTCATCGCAAAAATAAATCTCATTAAGATAAAACGCAACTCTGCAATGGACACTTCTCTTGATCGGAAGAATTTGGAAGAGGATTTAGGACGAGCAAGATCGGGCCGAGCTGAAAAGTAATCTTCCCCCTAAAGTAGAGTTGCCCGAAACAG  
 CACTGTGATCAACGCTACTCGCTGGGAAGAAAAGGTTTGTCTTCCGAATTCACTCTATACAATCGTAATGAAACTCTTCGCCGCG

> DFR1 (A104A)  
 CATTATCTGTTTCGATGATAAAGAGAAATTAAGAGCGCAACGAACACAGAGCATGGCTGGAGGAAAGATTCCTATTGTAGGAATTGTGGCATGTTACACGCGGAGATGGGATAGGATTTCGTGGAGGTTACACATGGAGGTTGCCCAAGTGA  
 AAGTAAGTATTCAGACAGAGATCTCATTTGACGAAGATGCAACAAACCAAGAGCTGTTGATATGGGAGGAAGCATCAAGGACATACACCGCCCAAGTTTGGCCCATCGCAATGAAGATGAGTCATTATATCAGAGCAAGTCTCAAGGAC  
 TTTGTTTCCGACATGAAGAGAGATCAATAGTCCCAAGTAATTCATGGCAACCGGATAGAATGAACCTAGAAAGCAATTTTAAAGGACATCTGGAAAGATCATCTGATGTGGGGTGGCGAAGTTTATGATCAAACTTCTCTCATTACAGATCAT  
 TTGGCTCATCGACAAAATAAATCTCATTAAGATAAAACCGCAACTCTGCAATGGACACTTCTCTGATCGGAAGAATTTGGGAAGAGATTATGCGCAGACAAGATCGGGCCAGCTGAAAGAAATTTCTCCCTCAAGATAGAGTTGCCCGAAAACAG  
 CACTGTGATCAACGCTACTCGCTGGAGGAAAAGGTTTGGCTCGAATTCACTCTATACAATTGAATCAACTCTCCGCGC

[illegible]

> DFR1(C142K)  
ACATTATCTTTCGATGATAATAAGAGAAATTAAGAGCGCAACGAACACGAGCATGGCTGGAGGAAGAATTCCTATTGTAGGAATTGTGCATGTTACAGCGGGAGATGGGATAGGATTTCGTGGAGGTTACCATGGAGGTGCGCAGTGA  
AAATGAAGTATTTCAGACAGGCTACCTTCATTGCAAGAAAGTCAAAACAAAGAAAGCTGTTGATATGGGAGGAAGCATAGGAAGTCATACACCGCCCAAGTTTGGCCCACTCCCAATAGAAATGAGTGACATTCATTATCAGAAAGATCTCAAGGAC  
TCTTCTTCCGACATAAAGAGAGATCAATAGTCCGAATTAAGTCTTGGCAACCAAGTAAGAACCTAGAAAGCAATTTTAAAGGATCTTGGAAAGAACTACGTGATCTGGGGTGCGGAAGTTATAGTCAAAATCTTCTCCATTACAGATCAT  
TTGGCTCATCCAGCAAGATAAATCTCATTAGATAAAAAAGCAACTCTGCAATGGACACTTCTCTTGATCGGAAGAATTTGGAAGAGATTTTAAAGCAGACAAGATCGGGCCAGCTGAAAGAATTTCTCCCCATAAGATAGATGTGCCGAAACAG  
CTGATGATCAACGCTACTCGCTGGGAAGAAGAATGTTGCTTCCGAATCTCACTCTATACAATCGTAATGAACCTCTCGCCGCG

> DFR1(T141T)  
 ACATTCCTGTTTCGATGATAATAAGAGAAATTAAGAGCGCAACGAACACAGCATGGCTGGAGGAAAGATTCCTATTGTAGGAATTGTGCATGTTACACGCGGAGATGGGATAGGATTCTGGTGAGGTCTACCATGGAGTTGCCCGAGT  
 AAGTAAGATATTTCAGACAGGACACTTCATTGACCAAGATTCACAAACAAAGAGCTGTTGATTAAGGAGGAAGCATATGGGAACATCATACCGCCCAAGTTTGGCCACCTCCCAATAGAAATGAGTCATTATATCAGAAAGCTCTCAAGGAC  
 TTTGTTTCCGACATGAAGAGAGCAATCAATGATCGCAAGTAATTCATGGCAACGCAATTAAGAACCTAGAAAGCAATTTAAGGAATCTTGGAAAGATCATCGATGTTGGGGTGGGGGAAAGTTATGAGCAAAATCTCTCCATTACAGATCAT  
 TTGGCTCATACCAAAATAAATCTCATTAGATAAAAAACCAACTCTCGCAATGGACACTTCTCTTGATCGGAAGAAATTTGGAAGAGATTTAGGACGAGCAAGATCGGCGCAGCTGAAAGAAATTTCTCCCTCAAGATAGAGTTGCCCGAAACAG  
 CACTGTGATCAACCTCTCGCTGGGAGGAAAAGGTTTGTCTCGAATTCACCTATACAACTGTAATGAATCAACTCTCGCCGC

> DFR1.1269TCTTGCATGATAATAAGAGAAATTAAGAGCGCAACGAACACAGCATGGCTGGAGGAAAGATCTCTATTGTAGGAATTGTGCATGTTACAGCGGGAGATGGGATAGATTTCGTGGAGGTTACACATGGAGGTTGCCCAAGTAAATGAAGATATTCAGACAGGACCTCATTTGACGAAGATGCAAAACAAAAGAGAGCTGTTGATATGGGAGGAAGCATAGGAAGCATATACCGCCCAAGTTTGGCCACCTGCCCAATAGAAATGAGTCATTATATCAGAAAGAGCTTCAAGGACATGTTGTTCCGATCAAGAAAGAGCATCAATGATCGCAAGTAATTCATGGGACCAAGTAATGAACCTAGAAAGCAATTTTAAAGGATCTGGAAAGAACTACGATGTGTGGGGTGGGGGAAAGTTATGATGCAAAATCTTCTCATTACAGCATCATTTGGCTCATCGCAAAATAAATCTCATTAGATAAAAAACGCAACTCTGCAATGACATCTTCTTGATCGGAGAAGATTTGGAAGAGGATTTGAGCGAGCAAGATCGGGCCGAGCTGAAAGAAATTTCTCCCTCAAGATAGAGATGGCCGAAACAGATGATGATCAACGCTACTCGCTGGAGGAAAAGGTTTGTGCTGCAATCTCACTATCAACAGTAATGAAATCTCTCGCCGC

> AF111(L116L).  
 CACTATCTTTCGATGATAATAAGAGAAATTAAGAGCGCAACGAACACAGACATGGCTGGAGGAAAGATCTCTATTGTAGGAATTGTGCATGTTACACGCGGAGATGGGATAGATTTCGTGGAGGTTACCATGGAGGTTGCCCAAGTGAATGAAGTATTCAGACAGAGCTACTTCATTCGACGAAGTATCCAAACAAAGAGAGAGTGGTATGATGAAGAGCATATCCGACCCCAAGTTGGCCGACCTCCCAATAGAAATAGCATTCATTAACAGAGAGAGCTCAAGGACATGTTGCTGTCAGCATAAGAGAGCTCAATGATGCTCAAGTAATTCATGGCAACGCAATGAATGAACCTAGAAAGACATTTTGGGAATCTAGAAAGAACTACGTGATGTGGGGTGGGGGAAGTTATGATGCAAAATCTCTCCATTACAGATCATTTGGCTCATCGCAAAATAAATCTCATTAAGATAAAACGCAACTCTCGCATGGACACTTCTCTGTGACGAAGAATTTGGAAGAGATTATGTCGAGCAAGACTCGGCCGAGCTGAAAAGATTTCTCCCTCAAGATAGAGATGGCCGAAAACAGATCTGATCAACGCTACTCGCTGGAGGAAAAGGTTTGTCTCGAATCTATACAATGAAATGAAATCTCTCGCCGC

> DFR1 (111V)  
 ACATTATTTGCTTCGATGATAATAAGAGAAATTTGAAGAGCGCAACGAACACAGCATGGCTGGGAGAAAGATTCCTATTGTAGGAGTTGTGGCATGTTACACGCGGGAGATGGGATAGGATTCTGGTGAGGCTACCATGGAGGTTGCCCGAGT  
 AATTAAGGATATTTCCAGACAGGCTACCTTCATTGACGAAGATGCAAAACAAAAAGGCTGTTGATTAATGGGAGGAAGCATAGGAAGTCAATACCGCCGCAAGTTTGGCCGACCTCAAGTAAGATGAGTGCTATTTATCCAGAGAGGCTTCAAGGAC  
 TTTGTTTCCGCATCAAGAAAGAGATCAATAGTCTCAAGTAATTTCAATGGCAACGCAATTAAGAACCTAGAAAGCAATTTTAAAGGAGATCTGGAAAGGATCACTGATGTGGGGTGCGGAAGTTTATGTCGAATCTTCTCCATTACAGATCA  
 TTGGCTCATCGACAAAATAAATCTCATTAGATAAAAAACGCAACTCTCGCATGATGGACATCTCTTGGTATCGGAAGAATTTGGAAGAGATTTAGGACGAGCAAGATCGGGCCGAGCTGAAAGAAATTTCTCCCTCAAGATAGAGTTGCCCGAAACAG  
 CACTGTGATCAACGCTACTCGCTGGGAGAAAAAGGTTTGGCTCGAATTCACCTATACAACTGTAATGAATCAATCTCTCGCCGC

> DFR1 (I11T)  
ACATTATGCTTTGGCATGATAATAAGAGAAATGAAGAGCGCAACGAACACGAGCATGGCTGGAGGAAAGATTCCTATTGTAGGAACCTGGGCATGTTTACAGCCGGAGATGGGGATAGGATTCGTGGAGGCTACCATGGAGGTTGCCCACTG  
AATGAAGATGATTCAGACAGGTCACCTTCATTGACGAAGAATGCTCAAAACAAAAAATGCTTTGATATGGGAAGGAAGACATGGGAATCCATACGCCCAAGTTTCGCCCACTGCCCAATGAATGAATGATTCATTATATCGAAGAGCTTCAAGGAC



ACATTATGCTTTGTCGATGATATAAAGAAGAAATTTGAAGAGCCCAACAGCATACAGAGCTGGCTGGAAGAAAGATCTCTTATGTAGGAATTGTGCATGTTACACGGAGATGGGATAGGATTCTGTGGAGGCTACCAAGGAGTGGCCCAAGTAAATGAAGATATTCAGACAGGCTCATCTTCAGCAAGAAAGTCTGTAAGTAATGGAAGAGACATCGAGGATCCATACGCCCAAGTTCGCGCGCTGACCTCAATGATCATTAATCGAAGCATCTCAAGGACGATTTCCTGCACATAAAGAGAGATCAATAGTCCAAAGTAATTCATTGCGAAACGCAATTAATGAACCTAGAAGACCAATTTAAGGAGCATCTTGGAAGAAATCATCTGATTTGGGGTGGCGAAGTTTATAGTCAAATCTTCTCATTACAGATCATTTGGCTCATCGCAAAATAAATCTCATTGATAAAAAAGCAACCTCGCATGAGGACCTTCTCTGATGCGAAGAAATTTGAAGAAAGATTTATTCGCGAGCAAGATCGGCGCAGCTGAAAGAAATTTCTTCCCTTAAAGTAGAGTGGCCGAAACAGACTGTGATCAACGCTACCTGCTGGGAAGAAAGGATTTGCTTGAACATCTCATCTGGAATGAACCTCTCCGGCG
